# Supplementary material for: Tumor proportion in colon cancer: results from a semiautomatic image analysis approach
Source: PubMed Central journal article supplement (PMC7985049; doi:10.1007/s00428-020-02764-1), 2020-02-19
Supplement: 428_2020_2764_MOESM1_ESM.pdf [file 428_2020_2764_MOESM1_ESM.pdf]

# Tumor Proportion in Colon Cancer – Results from a Semiautomatic Image Analysis Approach.

Benedikt Martin<sup>1</sup>, Bettina Monika Banner<sup>1</sup>, Eva-Maria Schäfer<sup>1</sup>, Patrick Mayr<sup>1, 2</sup>, Matthias Anthuber<sup>3</sup>, Gerhard Schenkirsch<sup>4</sup>, Bruno Märkl<sup>1</sup>

1 Institute of Pathology and Molecular Diagnostics, University Hospital Augsburg, Augsburg, Germany

2 Department of Radiooncology, University Hospital Augsburg, Augsburg, Germany

3 Department of Visceral Surgery, University Hospital Augsburg, Augsburg, Germany

4 Tumor Data Management, University Hospital Augsburg, Augsburg, Germany

## Supplement

S1 ROC Curve TPMax according to the occurrence of distant metastasis.

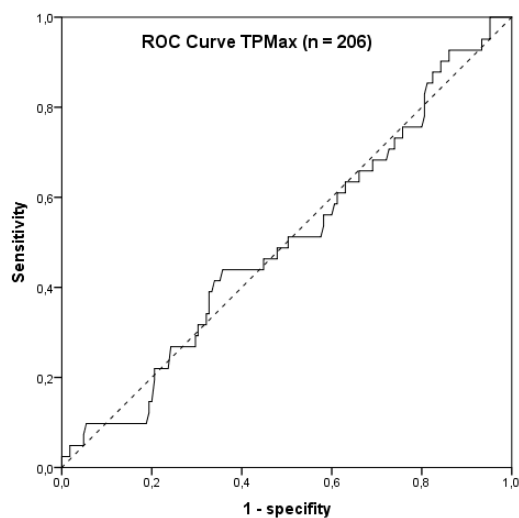

## S2 ROC Curve TPMin according to the occurrence of distant metastasis.

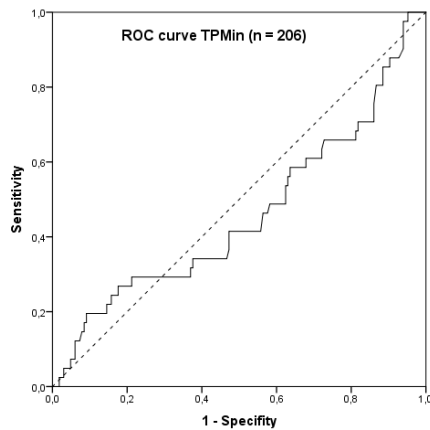

## S3 Comparison of exploration and validation set.

Supplement, table 4. Comparison of exploration and validation set

| Variable                | All<br>n = 206 | Exploration Set<br>n = 104 | Validation Set<br>n = 102 | P-value |
|-------------------------|----------------|----------------------------|---------------------------|---------|
| Mean Age (years)        | 70.0 ± 11.3    | 70.3 ± 11.8                | 69.9 ± 10.9               | 0.506   |
| Mean Follow-up (years)  | 5.3 ± 3.5      | 5.1 ± 3.3                  | 5.5 ± 3.7                 | 0.728   |
| Mean FroTP              | 35.9 ± 17.9    | 35.7 ± 17.4                | 36.2 ± 18.7               | 0.953   |
| Mean MinTP              | 32.3 ± 15.9    | 32.7 ± 15.4                | 32.0 ± 16.6               | 0.567   |
| Mean MaxTP              | 71.0 ± 13.1    | 70.7 ± 12.5                | 71.4 ± 13.9               | 0.451   |
| Lymphnode Harvest (n)   | 23.3 ± 13.2    | 23.4 ± 12.7                | 23.3 ± 13.8               | 0.829   |
| Positive Lymphnodes (n) | 1.2 ± 2.3      | 1.2 ± 2.6                  | 1.1 ± 1.9                 | 0.919   |
| Sex                     |                |                            |                           | 0.494   |
| female                  | 88<br>43%      | 42<br>40%                  | 46<br>45%                 |         |
| male                    | 118<br>57%     | 62<br>60%                  | 56<br>55%                 |         |
| T status                |                |                            |                           | 0.372   |
| T3                      | 180<br>87%     | 93<br>89%                  | 87<br>85%                 |         |
| T4                      | 26<br>13%      | 11<br>11%                  | 15<br>15%                 |         |
| Nodal Status            |                |                            |                           | 0.858   |
| negative                | 128<br>62%     | 64<br>62%                  | 64<br>63%                 |         |
| positive                | 78<br>38%      | 40<br>39%                  | 38<br>37%                 |         |
| Blood Vessel Invasion   |                |                            |                           | 0.145   |
| negative                | 186<br>90%     | 97<br>93%                  | 89<br>87%                 |         |
| positive                | 20<br>10%      | 7<br>7%                    | 13<br>13%                 |         |
| Lymphovascular Invasion |                |                            |                           | 0.535   |
| negative                | 171<br>83%     | 88<br>85%                  | 83<br>81%                 |         |
| positive                | 35<br>17%      | 16<br>15%                  | 19<br>19%                 |         |
| Grading                 |                |                            |                           | 0.149   |
| low grade               | 141<br>68%     | 76<br>73%                  | 65<br>64%                 |         |
| high grade              | 65<br>32%      | 28<br>27%                  | 37<br>36%                 |         |
| Tumor Budding           |                |                            |                           | 0.301   |
| Bd 1                    | 168<br>82%     | 88<br>84%                  | 80<br>78%                 |         |
| Bd 2                    | 25<br>12%      | 9<br>9%                    | 16<br>16%                 |         |
| Bd 3                    | 13<br>6%       | 7<br>7%                    | 6<br>6%                   |         |
| Location                |                |                            |                           | 0.266   |
| right-sided             | 127<br>62%     | 68<br>65%                  | 59<br>58%                 |         |
| left-sided              | 79<br>38%      | 36<br>35%                  | 43<br>42%                 |         |

|                    |          |     |     |        |     |        |     |       |
|--------------------|----------|-----|-----|--------|-----|--------|-----|-------|
| MSI                |          |     |     |        |     |        |     | 0.104 |
|                    | MSS      | 180 | 87% | 87     | 84% | 93     | 91% |       |
|                    | MSI      | 26  | 13% | 17     | 16% | 9      | 9%  |       |
| Distant Metastasis |          |     |     |        |     |        |     | 0.047 |
|                    | no       | 165 | 80% | 89     | 86% | 76     | 75% |       |
|                    | yes      | 41  | 20% | 15     | 14% | 26     | 26% |       |
| Death              |          |     |     |        |     |        |     | 0.758 |
|                    | no       | 121 | 59% | 60     | 58% | 61     | 60% |       |
|                    | death    | 85  | 41% | 44     | 42% | 41     | 40% |       |
| Five Year Survival |          |     |     | n = 84 |     | n = 76 |     | 0.728 |
| (n = 160)          | survived | 97  | 61% | 52     | 62% | 45     | 59% |       |
|                    | death    | 63  | 39% | 32     | 38% | 31     | 41% |       |

Legend: p-values are shown for the comparison of the exploration and validation set

Abbreviations: MSI: microsatellite instable, mss: microsatellite stabel
